# Supplementary material for: A cobalt oxyhydroxide nanoflake-based nanoprobe for the sensitive fluorescence detection of T4 polynucleotide kinase activity and inhibition
Source: Royal Society of Chemistry journal article supplement (doi:10.1039/c6nr01427e), 2016-01-01
Supplement: c6nr01427e1.pdf [file c6nr01427e1.pdf]

## Supporting Information

# Cobalt oxyhydroxide nanoflakes-based nanoprobe for sensitive fluorescence detection of T4 polynucleotide kinase activity and inhibition

Yao Cen, Yuan Yang, Ru-Qin Yu, Ting-Ting Chen,\* and Xia Chu\*

State Key Laboratory of Chemo/Bio-Sensing and Chemometrics, College of Chemistry and  
Chemical Engineering, Hunan University, Changsha 410082, P. R. China

\*Corresponding author. Tel.: 86-731-88821916; Fax: 86-731-88821916; E-mail:  
chenting1104@hnu.edu.cn; xiachu@hnu.edu.cn

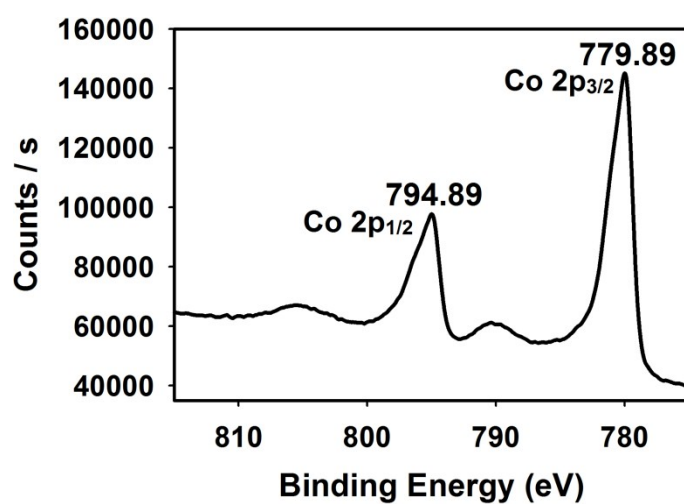

**Fig. S1.** X-ray photoelectron spectroscopy (XPS) spectrum of CoOOH nanoflakes.

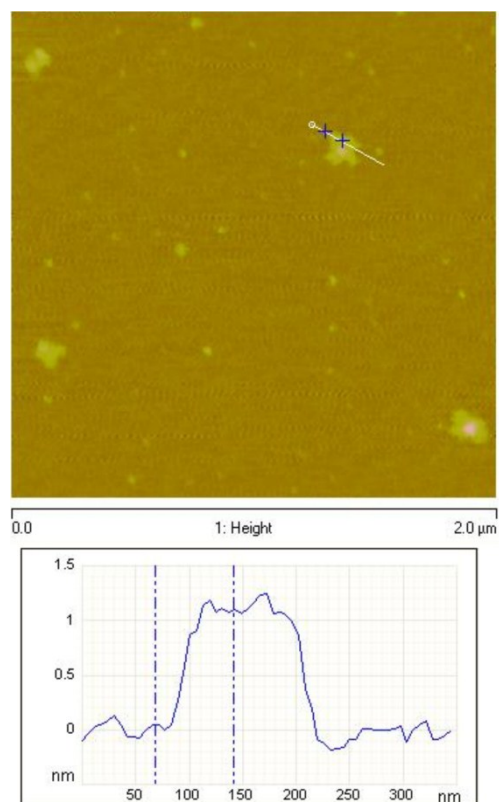

**Fig. S2.** AFM image for the prepared CoOOH nanoflakes on the mica substrate.

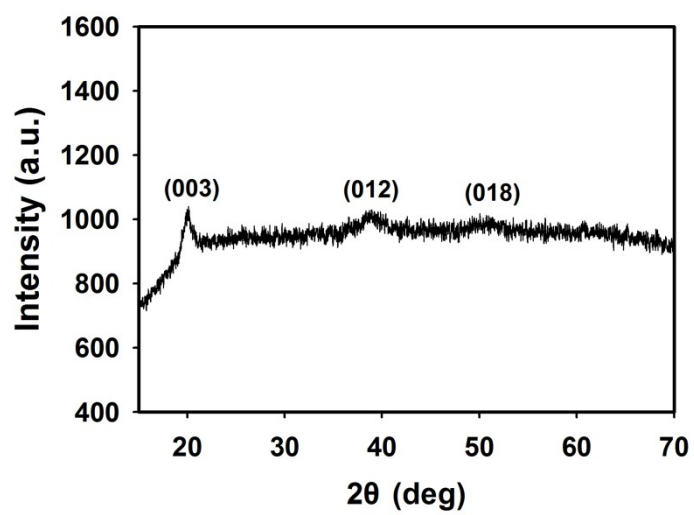

**Fig. S3.** The X-ray diffraction (XRD) pattern of CoOOH nanoflakes.

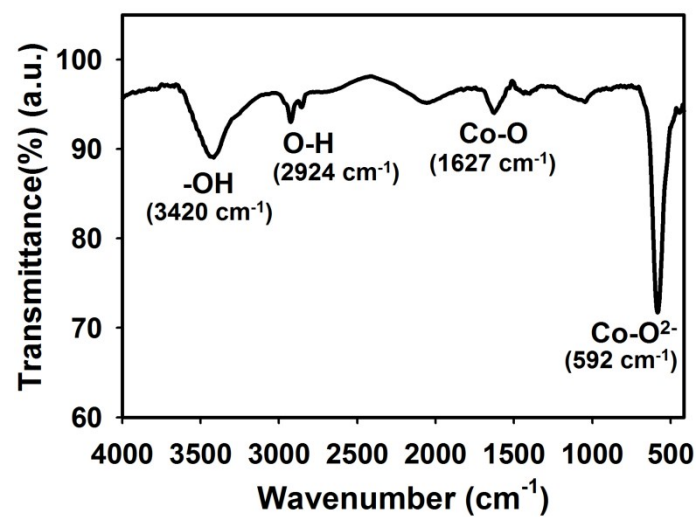

**Fig. S4.** Fourier transform infrared (FT-IR) spectrum of CoOOH nanoflakes.

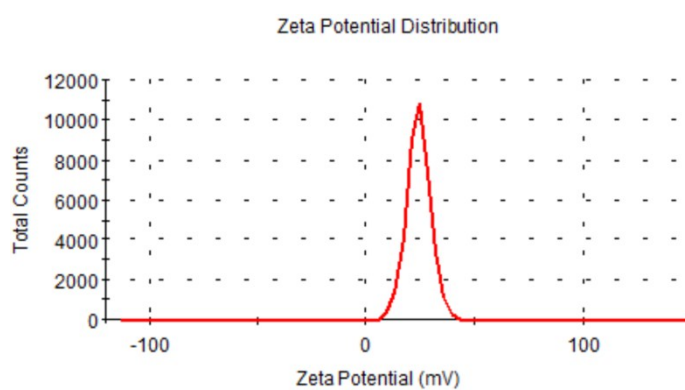

**Fig. S5.** Values of the  $\zeta$  potential for CoOOH nanoflakes.

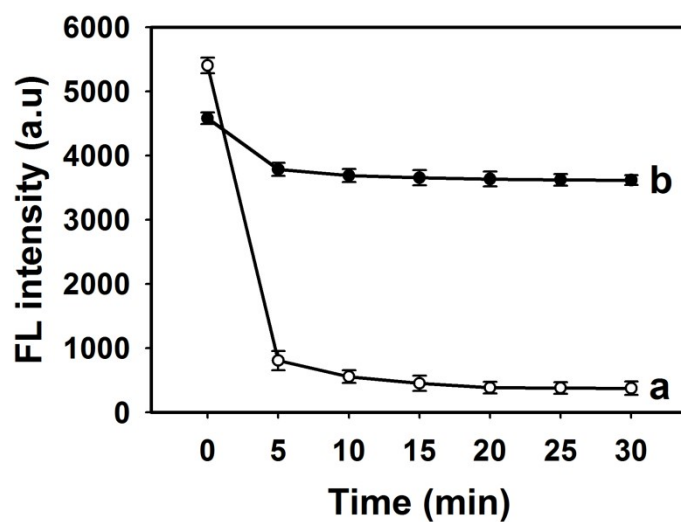

**Fig. S6.** Fluorescence intensities of (a) 100 nM P1-FAM and (b) 100 nM dsDNA-FAM via time in the presence of 16  $\mu\text{L}$  of CoOOH nanoflakes ( $0.25 \text{ mg mL}^{-1}$ ). The assays were all carried out in the Tris-HCl buffer (P1-FAM 100 nM, dsDNA-FAM 100 nM, ATP 0.5 mM,  $\lambda$  exonuclease 10 units).

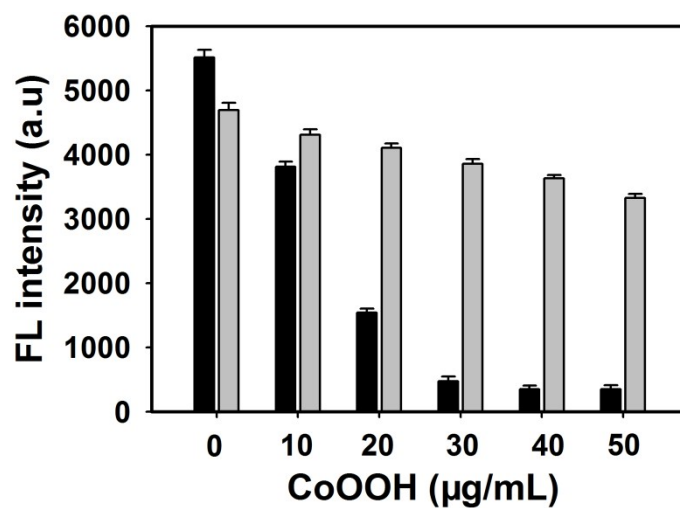

**Fig. S7.** Fluorescence intensity histogram of P1-FAM + CoOOH nanoflakes (black histogram) and dsDNA-FAM + CoOOH nanoflakes (gray histogram) in the presence of 0, 10, 20, 30, 40, and 50  $\mu\text{g mL}^{-1}$  CoOOH nanoflakes (P1-FAM 100 nM, dsDNA-FAM 100 nM,  $\lambda$  exonuclease 10 units).



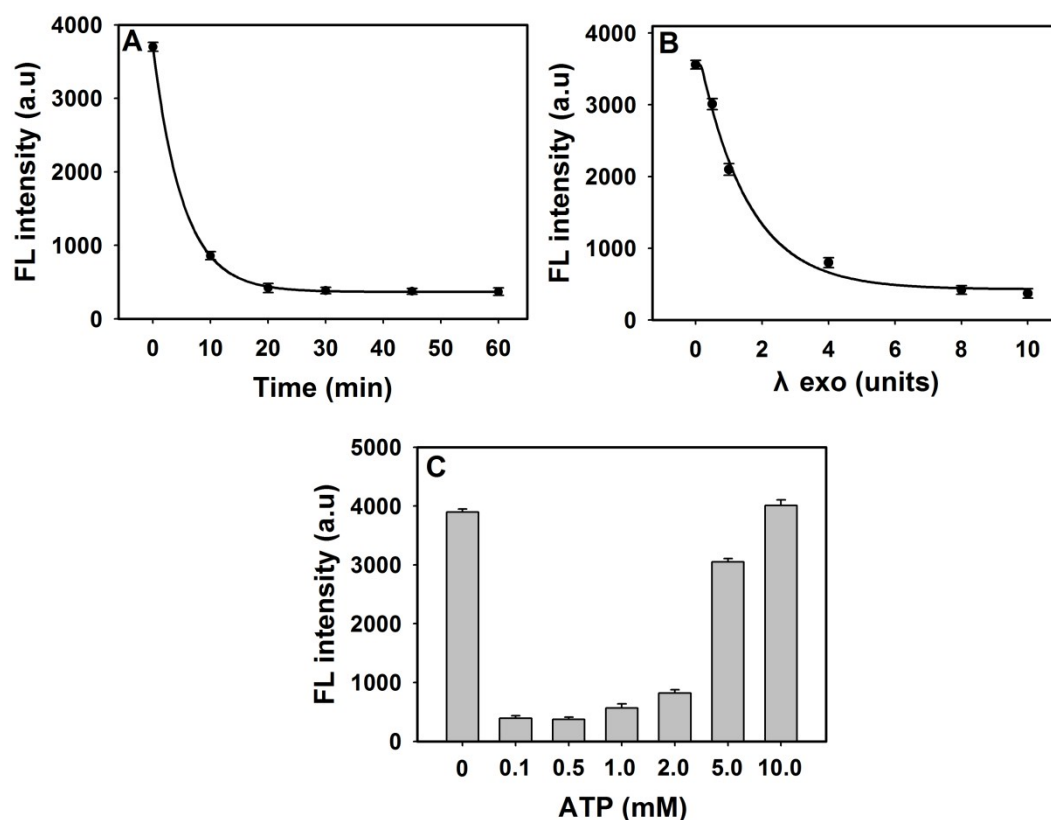

**Fig. S8.** (A) Optimization of the reaction time. The concentrations of ATP and  $\lambda$  exonuclease were 0.5 mM and 10 units, respectively. (B) Optimization of  $\lambda$  exonuclease concentration. The concentration of ATP was 0.5 mM. (C) Optimization of ATP concentration. The concentration of  $\lambda$  exonuclease was 10 units (dsDNA-FAM 100 nM, T4 PNK 10 U mL<sup>-1</sup>, CoOOH nanoflakes 40  $\mu$ g mL<sup>-1</sup>).

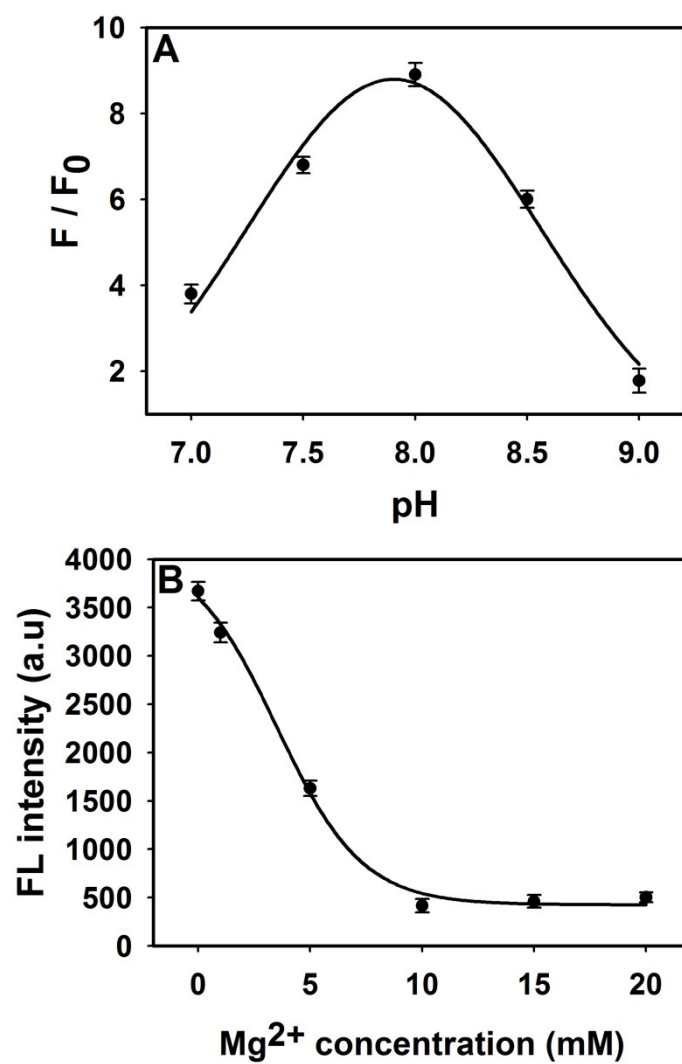

**Fig. S9.** Optimization of pH (A) and  $Mg^{2+}$  concentration (B). The concentrations of dsDNA-FAM, T4 PNK, ATP,  $\lambda$  exonuclease and CoOOH nanoflakes were 100 nM, 10 U mL<sup>-1</sup>, 0.5 mM, 10 units and 40  $\mu$ g mL<sup>-1</sup>, respectively.

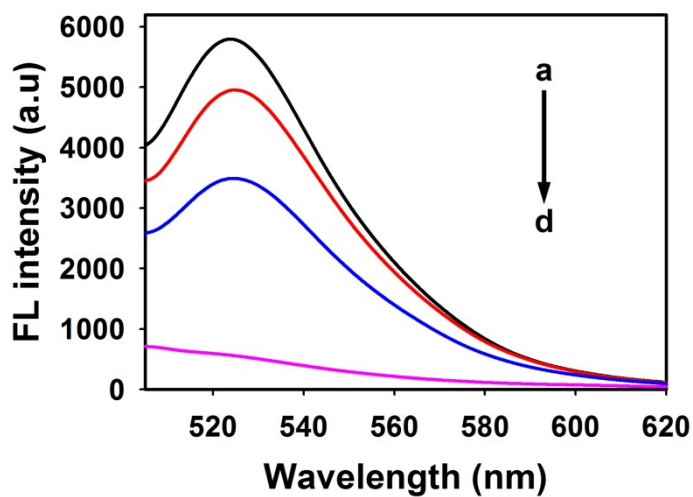

**Fig. S10.** Fluorescence spectra of P1-FAM without (a) and with (d) incubation with  $40 \mu\text{g mL}^{-1}$  CoOOH nanoflakes. Fluorescence spectra of dsDNA-FAM after incubation without (b) and with (c)  $40 \mu\text{g mL}^{-1}$  CoOOH nanoflakes. The assays were all carried out in the reaction buffer containing 1% (v/v) cell extracts (P1-FAM 100 nM, dsDNA-FAM 100 nM,  $\lambda$  exonuclease 10 units, CoOOH nanoflakes  $40 \mu\text{g mL}^{-1}$ ).
